# Supplementary material for: A Gateway MultiSite Recombination Cloning Toolkit
Source: PLoS One. 2011 Sep 9;6(9):e24531. doi: 10.1371/journal.pone.0024531 (PMC3170369; doi:10.1371/journal.pone.0024531)
Supplement: Table S1 — attB primer sequences for Gateway MultiSite cloning. The attB sequences flank gene-specific sequences in the oligonucleotides used to generate the PCR products that will be used as substrates in the BP reaction. Since only specific combinations of attB and attP sites are functional in the BP reaction, the attB sites must be chosen based on compatibility with the attP sites of each pDONR vector. (XLSX) [file pone.0024531.s003.xlsx]

## Sheet: Sheet1
attB1	5'-GGGGACAAGTTTGTACAAAAAAGCAGGCTCT-3'
attB5	5'-GGGGACAACTTTGTATACAAAAGTTGGC-3'
attB2	5'-GGGGACCACTTTGTACAAGAAAGCTGGGTA-3'
attB5r	5'-GGGGACAACTTTTGTATACAAAGTTGT-3'
attB4r	5'-GGGGACAACTTTTCTATACAAAGTTGGC-3'
attB3	5'-GGGGACAACTTTGTATAATAAAGTTGGC-3'
attB4	5'-GGGGACAACTTTGTATAGAAAAGTTGGGTG-3'
attB3r	5'-GGGGACAACTTTATTATACAAAGTTGT-3'
